# Supplementary material for: Dried Plum’s Polyphenolic Compounds and Carbohydrates Contribute to Its Osteoprotective Effects and Exhibit Prebiotic Activity in Estrogen Deficient C57BL/6 Mice
Source: MDPI journal article supplement (doi:10.3390/nu14091685), 2022-04-19
Supplement: s1 [file s1]

Table S1: Additional DXA and MicroCT parameters of the trabecular and cortical bone in ovariectomized mice supplemented with dried plum or the crude extract for 5 or 10 weeks.

|                                   | Sham-Con                    | OVX-Con                    | OVX-DP                       | OVX-Crude                   | P-Value |
|-----------------------------------|-----------------------------|----------------------------|------------------------------|-----------------------------|---------|
| <b>5 weeks</b>                    |                             |                            |                              |                             |         |
| Whole Body                        |                             |                            |                              |                             |         |
| BMC (mg)                          | 524.77 ± 11.34 <sup>b</sup> | 472.46 ± 7.47 <sup>c</sup> | 552.85 ± 9.09 <sup>ab</sup>  | 567.27 ± 11.41 <sup>a</sup> | <0.0001 |
| BMA (cm <sup>2</sup> )            | 10.17 ± 0.23 <sup>b</sup>   | 9.72 ± 0.15 <sup>b</sup>   | 10.94 ± 0.16 <sup>a</sup>    | 10.99 ± 0.19 <sup>a</sup>   | <0.0001 |
| Femur Mid-Diaphysis               |                             |                            |                              |                             |         |
| Medullary Area (um <sup>2</sup> ) | 37.57 ± 0.50                | 38.03 ± 0.70               | 37.72 ± 0.68                 | 37.62 ± 0.60                | 0.9550  |
| Cortical Porosity (%)             | 4.44 ± 0.10                 | 4.55 ± 0.10                | 4.65 ± 0.05                  | 4.37 ± 0.09                 | 0.1331  |
| <b>10 weeks</b>                   |                             |                            |                              |                             |         |
| Whole Body                        |                             |                            |                              |                             |         |
| BMC (mg)                          | 540.36 ± 8.69 <sup>a</sup>  | 453.71 ± 8.32 <sup>c</sup> | 531.14 ± 10.74 <sup>ab</sup> | 507.70 ± 9.96 <sup>b</sup>  | <0.0001 |
| BMA (cm <sup>2</sup> )            | 10.20 ± 0.28 <sup>a</sup>   | 9.24 ± 0.13 <sup>b</sup>   | 10.32 ± 0.12 <sup>a</sup>    | 9.97 ± 0.16 <sup>a</sup>    | <0.0001 |
| Femur Mid-Diaphysis               |                             |                            |                              |                             |         |
| Medullary Area (um <sup>2</sup> ) | 36.76 ± 0.27                | 37.50 ± 0.39               | 32.54 ± 3.07                 | 36.90 ± 0.55                | 0.0752  |
| Cortical Porosity (%)             | 4.27 ± 0.04                 | 4.50 ± 0.07                | 4.47 ± 0.12                  | 4.29 ± 0.05                 | 0.0505  |

Data were analyzed using 1-way ANOVA and are presented as mean ± SE. Within a given row, groups that do not share the same superscript letter are significantly different from each other. Bone mineral content (BMC), bone mineral area (BMA). Sham-operated (SHAM), ovariectomized (OVX), control diet (Con), diet supplemented with dried plum (DP), diet supplemented with crude polyphenol extract (Crude).

Table S2: Simple effects of the PP and CHO components of the crude extract on other whole body DXA and trabecular and cortical microCT parameters.

|                       |               |                |               |               | <i>P-Values</i> |                   |                   |                 |
|-----------------------|---------------|----------------|---------------|---------------|-----------------|-------------------|-------------------|-----------------|
|                       | OVX-Con       | OVX-Crude      | OVX-PP        | OVX-CHO       | PP vs<br>Con    | CHO vs<br>Con     | PP vs<br>Crude    | CHO vs<br>Crude |
| <b>5 weeks</b>        |               |                |               |               |                 |                   |                   |                 |
| Whole Body            |               |                |               |               |                 |                   |                   |                 |
| BMC (mg)              | 472.46 ± 7.47 | 567.27± 11.41  | 510.31±10.37  | 531.93 ±7.05  | <b>0.0184</b>   | <b>&lt;0.0001</b> | <b>&lt;0.0001</b> | <b>0.0105</b>   |
| BMA (cm²)             | 9.72 ± 0.15   | 10.99 ± 0.19   | 10.14 ± 0.15  | 10.53 ± 0.13  | 0.1759          | <b>0.0003</b>     | <b>&lt;0.0001</b> | 0.0620          |
| Distal Femur          |               |                |               |               |                 |                   |                   |                 |
| TbTh (mm)             | 0.041 ± 0.001 | 0.041 ± 0.001  | 0.041± 0.002  | 0.042 ± 0.001 | 0.7550          | 0.9079            | 0.7413            | 0.9215          |
| TbN (1/mm²)           | 3.09 ± 0.10   | 3.81 ± 0.04    | 3.22 ± 0.06   | 3.71 ± 0.11   | 0.2509          | <b>&lt;0.0001</b> | <b>&lt;0.0001</b> | 0.4110          |
| TbSp (mm)             | 0.32± 0.01    | 0.26 ± 0.003   | 0.31 ± 0.007  | 0.27 ± 0.008  | 0.2141          | <b>0.0001</b>     | <b>&lt;0.0001</b> | 0.4130          |
| Lumbar Vertebra       |               |                |               |               |                 |                   |                   |                 |
| TbTh (mm)             | 0.043 ± 0.001 | 0.048 ± 0.0004 | 0.046± 0.001  | 0.047 ± 0.001 | <b>0.0113</b>   | <b>0.0003</b>     | 0.0657            | 0.3479          |
| TbN (1/mm²)           | 3.94 ± 0.09   | 3.95 ± 0.06    | 3.80 ± 0.08   | 3.96 ± 0.07   | 0.2073          | 0.8652            | 0.1774            | 0.9416          |
| TbSp (mm)             | 0.260± 0.01   | 0.255 ± 0.004  | 0.267 ± 0.006 | 0.255 ± 0.005 | 0.1885          | 0.8139            | 0.1385            | 0.9588          |
| Femur Mid-Diaphysis   |               |                |               |               |                 |                   |                   |                 |
| Medullary Area (um²)  | 38.03 ± 0.70  | 37.62 ± 0.60   | 39.17 ± 1.16  | 39.75 ± 0.79  | 0.3524          | 0.1738            | 0.1963            | 0.0865          |
| Cortical Porosity (%) | 4.55 ± 0.10   | 4.37 ± 0.09    | 4.73 ± 0.15   | 4.57 ± 0.09   | 0.2669          | 0.9212            | <b>0.0229</b>     | 0.2159          |
| <b>10 weeks</b>       |               |                |               |               |                 |                   |                   |                 |
| Whole Body            |               |                |               |               |                 |                   |                   |                 |
| BMC (mg)              | 453.71± 8.32  | 507.70 ± 9.96  | 499.13 ± 6.25 | 524.10 ± 5.53 | <b>0.0004</b>   | <b>&lt;0.0001</b> | 0.4975            | 0.1727          |
| BMA (cm²)             | 9.24 ± 0.13   | 9.97 ± 0.16    | 9.64 ± 0.05   | 10.11 ± 0.12  | <b>0.0420</b>   | <b>&lt;0.0001</b> | 0.1190            | 0.4633          |
| Distal Femur          |               |                |               |               |                 |                   |                   |                 |
| TbTh (mm)             | 0.045 ± 0.001 | 0.045 ± 0.001  | 0.047 ± 0.002 | 0.043 ± 0.001 | 0.4481          | 0.2021            | 0.4481            | 0.2427          |
| TbN (1/mm²)           | 2.81 ± 0.08   | 3.28 ± 0.08    | 2.98 ± 0.05   | 3.53 ± 0.11   | 0.1936          | <b>&lt;0.0001</b> | <b>0.0304</b>     | 0.0520          |
| TbSp (mm)             | 0.36 ± 0.01   | 0.30 ± 0.01    | 0.33 ± 0.01   | 0.28 ± 0.01   | 0.0673          | <b>&lt;0.0001</b> | <b>0.0346</b>     | 0.0914          |
| Lumbar Vertebra       |               |                |               |               |                 |                   |                   |                 |
| TbTh (mm)             | 0.047 ±0.0004 | 0.050 ± 0.001  | 0.050 ± 0.001 | 0.050 ± 0.001 | <b>0.0041</b>   | <b>0.0029</b>     | 0.5906            | 0.4979          |
| TbN (1/mm²)           | 3.37 ± 0.08   | 3.88 ± 0.19    | 3.67 ± 0.04   | 4.13 ± 0.11   | 0.1246          | <b>0.0002</b>     | 0.2465            | 0.1460          |
| TbSp                  | 0.30 ± 0.01   | 0.26 ± 0.01    | 0.27 ± 0.003  | 0.24 ± 0.01   | 0.0721          | <b>0.0001</b>     | 0.4567            | 0.0673          |
| Femur Mid-Diaphysis   |               |                |               |               |                 |                   |                   |                 |
| Medullary Area (um²)  | 37.50 ± 0.39  | 36.90 ± 0.55   | 36.43 ± 0.48  | 36.46 ± 0.39  | 0.1167          | 0.0839            | 0.5020            | 0.4806          |
| Cortical Porosity (%) | 4.50 ± 0.07   | 4.29 ± 0.05    | 4.12 ± 0.10   | 4.36 ± 0.10   | <b>0.0068</b>   | 0.2118            | 0.2337            | 0.5694          |

Data are presented as mean ± SE. Bone mineral content (BMC), bone mineral area (BMA). Ovariectomized (OVX), control diet (Con), diet supplemented with crude polyphenol extract (Crude), phenolic enriched diet (PP), and carbohydrate enriched diet (CHO).
